# Supplementary material for: An analysis of oligomerization interfaces in transmembrane proteins
Source: PubMed Central journal article supplement (PMC4015793; doi:10.1186/1472-6807-13-21), 2013-10-17
Supplement: 1472-6807-13-21-S1.pdf [file 1472-6807-13-21-S1.pdf]

Additional file 1

| PDB  | Id | BSA      | n1  | n2  | geometry |      | core-rim |        | core-surface |        | final |      |
|------|----|----------|-----|-----|----------|------|----------|--------|--------------|--------|-------|------|
| 1a0t | 1  | 1,967.37 | 55  | 55  | 23       | bio  | 0.60     | bio    | -3.11        | bio    | 3     | bio  |
| 1a0t | 2  | 1,965.86 | 55  | 55  | 23       | bio  | 0.62     | bio    | -3.10        | bio    | 3     | bio  |
| 1a0t | 3  | 1,964.43 | 55  | 55  | 23       | bio  | 0.61     | bio    | -3.02        | bio    | 3     | bio  |
| 1af6 | 1  | 1,844.06 | 77  | 77  | 23       | bio  | 0.60     | bio    | -2.76        | bio    | 3     | bio  |
| 1af6 | 2  | 1,842.20 | 77  | 77  | 22       | bio  | 0.60     | bio    | -2.76        | bio    | 3     | bio  |
| 1af6 | 3  | 1,840.30 | 77  | 77  | 23       | bio  | 0.60     | bio    | -2.75        | bio    | 3     | bio  |
| 1ek9 | 1  | 2,441.63 | 96  | 96  | 4        | xtal | 0.74     | bio    | -1.35        | bio    | 0     | bio  |
| 1ek9 | 2  | 2,438.95 | 96  | 96  | 4        | xtal | 0.69     | bio    | -1.44        | bio    | 0     | bio  |
| 1ek9 | 3  | 2,430.41 | 96  | 96  | 5        | xtal | 0.70     | bio    | -1.47        | bio    | 0     | bio  |
| 1eys | 1  | 4,828.53 | 83  | 102 | 57       | bio  | 0.68     | bio    | -7.74        | bio    | 0     | bio  |
| 1jb0 | 1  | 3,967.59 | 105 | 107 | 78       | bio  | 0.38     | bio    | -5.86        | bio    | 0     | bio  |
| 1jb0 | 5  | 1,105.55 | 49  | 105 | 8        | bio  | 0.66     | bio    | NaN          | bio    | 3     | bio  |
| 1jb0 | 7  | 915.10   | 22  | 22  | 4        | xtal | 0.75     | bio    | -1.51        | bio    | 2     | bio  |
| 1k4c | 2  | 1,081.94 | 9   | 9   | 10       | bio  | 0.73     | nopred | -2.59        | nopred | 1     | bio  |
| 1ldf | 1  | 1,581.38 | 102 | 102 | 23       | bio  | 0.46     | bio    | -2.19        | bio    | 3     | bio  |
| 1lgh | 1  | 940.40   | 12  | 8   | 3        | xtal | 0.27     | bio    | -3.85        | bio    | 2     | bio  |
| 1lgh | 3  | 939.70   | 12  | 8   | 3        | xtal | 0.27     | bio    | -3.91        | bio    | 2     | bio  |
| 1lgh | 5  | 600.77   | 8   | 8   | 2        | xtal | 1.09     | nopred | -0.60        | nopred | 1     | xtal |
| 1lgh | 8  | 581.01   | 8   | 8   | 1        | xtal | 1.50     | nopred | -0.07        | nopred | 1     | xtal |
| 1ppj | 14 | 1,115.12 | 67  | 79  | 3        | xtal | 0.73     | bio    | -0.39        | xtal   | 2     | xtal |
| 1q16 | 7  | 824.59   | 74  | 74  | 0        | xtal | 1.24     | xtal   | -0.41        | xtal   | 3     | xtal |
| 1qd6 | 1  | 1,441.46 | 92  | 92  | 3        | xtal | 0.39     | bio    | -2.18        | bio    | 2     | bio  |
| 1rwt | 2  | 995.20   | 119 | 119 | 10       | bio  | 0.63     | bio    | -1.90        | bio    | 3     | bio  |
| 1rwt | 3  | 979.02   | 119 | 119 | 9        | bio  | 0.57     | bio    | -1.68        | bio    | 3     | bio  |
| 1rwt | 5  | 962.82   | 119 | 119 | 9        | bio  | 0.64     | bio    | -1.82        | bio    | 3     | bio  |
| 1u7g | 1  | 1,707.86 | 90  | 90  | 22       | bio  | 0.94     | xtal   | -1.04        | bio    | 2     | bio  |
| 1uun | 1  | 1,892.53 | 29  | 29  | 9        | bio  | 0.62     | bio    | -1.51        | bio    | 3     | bio  |
| 1uun | 2  | 1,891.08 | 29  | 29  | 10       | bio  | 0.56     | bio    | -1.60        | bio    | 3     | bio  |
| 1v54 | 4  | 2,716.39 | 124 | 46  | 42       | bio  | 0.35     | bio    | -4.46        | bio    | 0     | bio  |
| 1v54 | 6  | 1,904.80 | 82  | 124 | 17       | bio  | 0.59     | bio    | NaN          | xtal   | 2     | bio  |
| 1v54 | 8  | 1,810.38 | 102 | 46  | 21       | bio  | 0.70     | bio    | NaN          | xtal   | 2     | bio  |
| 1v54 | 15 | 1,372.85 | 118 | 124 | 13       | bio  | 0.73     | bio    | -1.38        | bio    | 3     | bio  |
| 1v54 | 30 | 910.99   | 46  | 82  | 6        | bio  | 1.31     | xtal   | 1.46         | xtal   | 2     | xtal |
| 1v54 | 31 | 718.29   | 33  | 102 | 1        | xtal | 0.90     | nopred | -1.51        | nopred | 1     | xtal |
| 1yc9 | 1  | 2,581.47 | 11  | 11  | 11       | bio  | 0.47     | bio    | -1.70        | bio    | 0     | bio  |
| 1z98 | 1  | 1,749.51 | 118 | 118 | 26       | bio  | 0.37     | bio    | -3.32        | bio    | 3     | bio  |
| 1z98 | 2  | 1,744.76 | 118 | 118 | 23       | bio  | 0.40     | bio    | -3.52        | bio    | 3     | bio  |
| 2b2f | 1  | 1,905.34 | 31  | 31  | 35       | bio  | 0.84     | xtal   | -1.35        | bio    | 2     | bio  |
| 2bhw | 1  | 915.74   | 119 | 119 | 7        | bio  | 0.53     | bio    | -1.73        | bio    | 3     | bio  |
| 2bhw | 2  | 915.19   | 119 | 119 | 8        | bio  | 0.53     | bio    | -1.71        | bio    | 3     | bio  |
| 2bhw | 3  | 910.88   | 119 | 119 | 7        | bio  | 0.53     | bio    | -1.72        | bio    | 3     | bio  |
| 2bs2 | 3  | 2,050.12 | 16  | 16  | 8        | bio  | 0.81     | xtal   | -1.08        | bio    | 2     | bio  |
| 2f2b | 1  | 1,764.89 | 24  | 24  | 26       | bio  | 0.63     | bio    | -1.13        | bio    | 3     | bio  |
| 2fgr | 1  | 1,232.88 | 10  | 10  | 15       | bio  | 0.35     | bio    | -3.24        | bio    | 3     | bio  |
| 2gr8 | 2  | 1,089.95 | 8   | 8   | 11       | bio  | 1.04     | nopred | 1.66         | nopred | 1     | bio  |
| 2gr8 | 3  | 1,087.53 | 8   | 8   | 9        | bio  | 0.86     | nopred | 1.78         | nopred | 1     | bio  |
| 2gr8 | 4  | 1,082.06 | 8   | 8   | 10       | bio  | 0.93     | nopred | 2.05         | nopred | 1     | bio  |
| 2j1n | 1  | 1,570.40 | 110 | 110 | 18       | bio  | 0.72     | bio    | -0.69        | xtal   | 2     | bio  |
| 2j1n | 2  | 1,566.71 | 110 | 110 | 18       | bio  | 0.78     | xtal   | -0.66        | xtal   | 2     | xtal |
| 2j1n | 3  | 1,564.96 | 110 | 110 | 18       | bio  | 0.69     | bio    | -0.89        | xtal   | 2     | bio  |
| 2j58 | 1  | 4,294.95 | 107 | 107 | 15       | bio  | 0.56     | bio    | -5.60        | bio    | 0     | bio  |
| 2j58 | 2  | 4,285.26 | 107 | 107 | 20       | bio  | 0.51     | bio    | -5.82        | bio    | 0     | bio  |
| 2j58 | 3  | 4,257.43 | 107 | 107 | 20       | bio  | 0.53     | bio    | -6.00        | bio    | 0     | bio  |
| 2j58 | 4  | 4,256.53 | 107 | 107 | 17       | bio  | 0.52     | bio    | -5.69        | bio    | 0     | bio  |
| 2j58 | 5  | 4,255.17 | 107 | 107 | 20       | bio  | 0.50     | bio    | -5.96        | bio    | 0     | bio  |
| 2j58 | 6  | 4,248.70 | 107 | 107 | 19       | bio  | 0.55     | bio    | -6.04        | bio    | 0     | bio  |
| 2j58 | 7  | 4,242.90 | 107 | 107 | 19       | bio  | 0.51     | bio    | -5.94        | bio    | 0     | bio  |
| 2j58 | 8  | 4,200.38 | 107 | 107 | 20       | bio  | 0.51     | bio    | -5.82        | bio    | 0     | bio  |
| 2j7a | 23 | 671.21   | 9   | 9   | 4        | xtal | 0.69     | nopred | -0.14        | nopred | 1     | xtal |
| 2j8c | 1  | 4,808.45 | 75  | 106 | 79       | bio  | 0.52     | bio    | -7.99        | bio    | 0     | bio  |
| 2j8s | 1  | 3,320.38 | 106 | 106 | 14       | bio  | 0.35     | bio    | -2.85        | bio    | 0     | bio  |
| 2j8s | 2  | 3,145.04 | 106 | 106 | 10       | bio  | 0.32     | bio    | -2.76        | bio    | 0     | bio  |
| 2j8s | 3  | 2,818.52 | 106 | 106 | 10       | bio  | 0.56     | bio    | -2.20        | bio    | 0     | bio  |
| 2mpr | 1  | 1,877.41 | 76  | 76  | 23       | bio  | 0.57     | bio    | -2.74        | bio    | 3     | bio  |
| 2mpr | 2  | 1,873.89 | 76  | 76  | 23       | bio  | 0.54     | bio    | -2.84        | bio    | 3     | bio  |
| 2mpr | 3  | 1,868.01 | 76  | 76  | 22       | bio  | 0.54     | bio    | -2.82        | bio    | 3     | bio  |
| 2o4v | 1  | 2,018.80 | 27  | 27  | 17       | bio  | 0.76     | xtal   | -2.78        | bio    | 2     | bio  |
| 2o4v | 2  | 2,015.21 | 27  | 27  | 17       | bio  | 0.77     | xtal   | -2.75        | bio    | 2     | bio  |

continued on next page

| PDB  | Id | BSA      | n1  | n2  | geometry | core-rim        | core-surface | final  |
|------|----|----------|-----|-----|----------|-----------------|--------------|--------|
| 2o4v | 3  | 1,996.42 | 27  | 27  | 16 bio   | 0.75 xtal       | -2.78 bio    | 2 bio  |
| 2o9d | 1  | 1,829.57 | 101 | 101 | 30 bio   | 0.46 bio        | -2.52 bio    | 3 bio  |
| 2o9d | 2  | 1,717.59 | 101 | 101 | 29 bio   | 0.45 bio        | -2.50 bio    | 3 bio  |
| 2qi9 | 1  | 1,882.77 | 94  | 94  | 6 bio    | 0.60 bio        | -3.11 bio    | 3 bio  |
| 2w2e | 1  | 2,553.53 | 14  | 14  | 28 bio   | 0.46 bio        | -0.94 xtal   | 0 bio  |
| 2wgm | 5  | 1,924.29 | 77  | 77  | 31 bio   | 0.81 xtal       | NaN nopred   | 1 xtal |
| 2wgm | 8  | 1,922.22 | 77  | 77  | 31 bio   | 0.80 xtal       | NaN nopred   | 1 xtal |
| 2wgm | 11 | 1,919.28 | 77  | 77  | 30 bio   | 0.86 xtal       | NaN nopred   | 1 xtal |
| 2wgm | 19 | 1,915.75 | 77  | 77  | 31 bio   | 0.84 xtal       | NaN nopred   | 1 xtal |
| 2wgm | 20 | 1,915.47 | 77  | 77  | 32 bio   | 0.79 xtal       | NaN nopred   | 1 xtal |
| 2wgm | 21 | 1,914.82 | 77  | 77  | 31 bio   | 0.83 xtal       | NaN nopred   | 1 xtal |
| 2wgm | 22 | 1,914.72 | 77  | 77  | 32 bio   | 0.85 xtal       | NaN nopred   | 1 xtal |
| 2wgm | 33 | 1,900.78 | 77  | 77  | 30 bio   | 0.80 xtal       | NaN nopred   | 1 xtal |
| 2wgm | 35 | 1,897.38 | 77  | 77  | 31 bio   | 0.80 xtal       | NaN nopred   | 1 xtal |
| 2wgm | 38 | 1,895.48 | 77  | 77  | 31 bio   | 0.80 xtal       | NaN nopred   | 1 xtal |
| 2wgm | 44 | 1,887.79 | 77  | 77  | 30 bio   | 0.79 xtal       | NaN nopred   | 1 xtal |
| 2wie | 1  | 1,909.58 | 103 | 103 | 35 bio   | 1.19 xtal       | NaN nopred   | 1 xtal |
| 2wie | 2  | 1,889.23 | 103 | 103 | 33 bio   | 1.20 xtal       | NaN nopred   | 1 xtal |
| 2wie | 3  | 1,877.42 | 103 | 103 | 35 bio   | 1.22 xtal       | NaN nopred   | 1 xtal |
| 2wie | 4  | 1,867.64 | 103 | 103 | 34 bio   | 1.21 xtal       | NaN nopred   | 1 xtal |
| 2wie | 5  | 1,856.78 | 103 | 103 | 33 bio   | 1.36 xtal       | NaN nopred   | 1 xtal |
| 2wjn | 1  | 4,693.27 | 18  | 102 | 57 bio   | 0.79 xtal       | -4.95 bio    | 0 bio  |
| 2wlj | 1  | 2,247.77 | 9   | 9   | 13 bio   | 0.86 nopred     | -1.22 nopred | 0 bio  |
| 2wlj | 2  | 2,183.44 | 9   | 9   | 10 bio   | 0.61 nopred     | -1.90 nopred | 1 bio  |
| 2wsw | 2  | 715.72   | 23  | 23  | 3 xtal   | 0.45 bio        | -0.33 xtal   | 2 xtal |
| 2zfg | 1  | 1,440.50 | 104 | 104 | 19 bio   | 0.78 xtal       | -1.74 bio    | 2 bio  |
| 3arc | 1  | 6,054.21 | 101 | 82  | 111 bio  | 0.80 xtal       | NaN nopred   | 0 bio  |
| 3arc | 4  | 3,644.40 | 113 | 82  | 41 bio   | 2.05 xtal       | NaN xtal     | 0 bio  |
| 3arc | 5  | 3,250.90 | 101 | 102 | 29 bio   | 1.15 xtal       | NaN bio      | 0 bio  |
| 3b9w | 1  | 1,983.85 | 15  | 15  | 28 bio   | 0.49 bio        | -4.20 bio    | 3 bio  |
| 3c02 | 1  | 1,591.30 | 6   | 6   | 22 bio   | 0.33 nopred     | -1.82 nopred | 1 bio  |
| 3cx5 | 6  | 1,491.21 | 28  | 104 | 5 xtal   | 1.03 xtal       | -0.49 xtal   | 3 xtal |
| 3d5k | 1  | 2,739.74 | 102 | 102 | 7 bio    | 0.59 bio        | -2.27 bio    | 0 bio  |
| 3d5k | 2  | 2,738.93 | 102 | 102 | 10 bio   | 0.58 bio        | -2.46 bio    | 0 bio  |
| 3d5k | 3  | 2,726.55 | 102 | 102 | 8 bio    | 0.65 bio        | -2.37 bio    | 0 bio  |
| 3d9s | 1  | 1,558.88 | 87  | 87  | 22 bio   | 0.55 bio        | -1.84 bio    | 3 bio  |
| 3d9s | 2  | 1,547.05 | 87  | 87  | 21 bio   | 0.62 bio        | -1.68 bio    | 3 bio  |
| 3d9s | 3  | 1,542.02 | 87  | 87  | 22 bio   | 0.58 bio        | -1.54 bio    | 3 bio  |
| 3d9s | 4  | 1,527.44 | 87  | 87  | 24 bio   | 0.53 bio        | -1.75 bio    | 3 bio  |
| 3gd8 | 1  | 1,515.83 | 35  | 35  | 16 bio   | 0.35 bio        | -2.46 bio    | 3 bio  |
| 3hb3 | 1  | 3,887.81 | 30  | 106 | 26 bio   | 0.53 bio        | -4.90 bio    | 0 bio  |
| 3jqo | 1  | 2,342.02 | 10  | 10  | 4 xtal   | 0.83 xtal       | 1.78 xtal    | 0 bio  |
| 3jqo | 2  | 2,336.49 | 10  | 10  | 5 xtal   | 0.85 xtal       | NaN xtal     | 0 bio  |
| 3jqo | 3  | 2,327.38 | 10  | 10  | 5 xtal   | 0.84 xtal       | NaN xtal     | 0 bio  |
| 3jqo | 4  | 2,323.32 | 10  | 10  | 6 bio    | 0.77 xtal       | NaN xtal     | 0 bio  |
| 3jqo | 5  | 2,306.63 | 10  | 10  | 5 xtal   | 0.78 xtal       | NaN xtal     | 0 bio  |
| 3jqo | 6  | 2,306.03 | 10  | 10  | 5 xtal   | 0.87 xtal       | NaN xtal     | 0 bio  |
| 3jqo | 7  | 2,299.34 | 10  | 10  | 5 xtal   | 0.88 xtal       | NaN xtal     | 0 bio  |
| 3jqo | 8  | 2,299.00 | 10  | 10  | 5 xtal   | 0.73 bio        | NaN xtal     | 0 bio  |
| 3jqo | 9  | 2,291.00 | 10  | 10  | 5 xtal   | 0.77 xtal       | NaN xtal     | 0 bio  |
| 3jqo | 10 | 2,288.86 | 10  | 10  | 5 xtal   | 0.81 xtal       | 2.37 xtal    | 0 bio  |
| 3jqo | 11 | 2,280.57 | 10  | 10  | 5 xtal   | 0.79 xtal       | NaN xtal     | 0 bio  |
| 3jqo | 12 | 2,276.64 | 10  | 10  | 5 xtal   | 0.82 xtal       | 1.90 xtal    | 0 bio  |
| 3jqo | 13 | 2,273.28 | 10  | 10  | 5 xtal   | 0.91 xtal       | NaN xtal     | 0 bio  |
| 3jqo | 14 | 2,227.60 | 10  | 10  | 5 xtal   | 0.79 xtal       | 1.02 xtal    | 0 bio  |
| 3k3f | 1  | 1,689.32 | 0   | 0   | 12 bio   | 1,000.00 nopred | NaN nopred   | 1 bio  |
| 3kcu | 1  | 1,615.51 | 111 | 111 | 16 bio   | 0.69 bio        | -1.87 bio    | 3 bio  |
| 3kcu | 2  | 1,581.06 | 111 | 111 | 16 bio   | 0.56 bio        | -2.03 bio    | 3 bio  |
| 3kcu | 3  | 1,491.53 | 111 | 111 | 17 bio   | 0.57 bio        | -2.10 bio    | 3 bio  |
| 3kcu | 4  | 1,487.20 | 111 | 111 | 17 bio   | 0.57 bio        | -2.10 bio    | 3 bio  |
| 3kcu | 5  | 1,426.85 | 111 | 111 | 16 bio   | 0.54 bio        | -2.17 bio    | 3 bio  |
| 3kly | 1  | 1,689.28 | 34  | 34  | 16 bio   | 0.64 bio        | -1.27 bio    | 3 bio  |
| 3kly | 2  | 1,646.64 | 34  | 34  | 17 bio   | 0.58 bio        | -1.41 bio    | 3 bio  |
| 3kly | 3  | 1,637.08 | 34  | 34  | 16 bio   | 0.57 bio        | -1.45 bio    | 3 bio  |
| 3kly | 4  | 1,631.44 | 34  | 34  | 16 bio   | 0.58 bio        | -1.35 bio    | 3 bio  |
| 3kly | 5  | 1,616.54 | 34  | 34  | 17 bio   | 0.56 bio        | -1.51 bio    | 3 bio  |
| 3lde | 1  | 821.44   | 3   | 3   | 5 xtal   | 0.30 nopred     | -1.62 nopred | 1 xtal |
| 3m7l | 1  | 1,490.55 | 11  | 11  | 10 bio   | 0.64 bio        | -1.62 bio    | 3 bio  |
| 3pik | 1  | 2,662.31 | 33  | 33  | 4 xtal   | 0.82 xtal       | -0.82 xtal   | 0 bio  |
| 3rlf | 1  | 3,993.60 | 103 | 89  | 30 bio   | 0.31 bio        | -5.97 bio    | 0 bio  |

continued on next page

Additional file 1 - continued from previous page

| PDB  | Id | BSA      | n1  | n2  | geometry |     | core-rim |        | core-surface |        | final |      |
|------|----|----------|-----|-----|----------|-----|----------|--------|--------------|--------|-------|------|
| 3tdo | 1  | 1,711.47 | 15  | 15  | 23       | bio | 0.72     | bio    | -2.71        | bio    | 3     | bio  |
| 3tdo | 2  | 1,610.37 | 15  | 15  | 24       | bio | 0.63     | bio    | -2.94        | bio    | 3     | bio  |
| 3tdo | 3  | 1,603.49 | 15  | 15  | 24       | bio | 0.57     | bio    | -3.06        | bio    | 3     | bio  |
| 3tdo | 4  | 1,595.40 | 15  | 15  | 22       | bio | 0.62     | bio    | -2.92        | bio    | 3     | bio  |
| 3tdo | 5  | 1,581.25 | 15  | 15  | 22       | bio | 0.62     | bio    | -2.89        | bio    | 3     | bio  |
| 3tij | 1  | 1,259.18 | 105 | 105 | 10       | bio | 0.51     | bio    | -2.27        | bio    | 3     | bio  |
| 3vzt | 1  | 1,452.94 | 78  | 78  | 14       | bio | 0.43     | bio    | -2.51        | bio    | 3     | bio  |
| 4a01 | 1  | 3,265.69 | 111 | 111 | 61       | bio | 0.32     | bio    | -5.68        | bio    | 0     | bio  |
| 4av3 | 1  | 2,838.90 | 10  | 10  | 47       | bio | 0.56     | bio    | -2.83        | bio    | 0     | bio  |
| 4f4s | 1  | 1,633.16 | 107 | 107 | 28       | bio | 0.98     | xtal   | NaN          | nopred | 1     | xtal |
| 4f4s | 5  | 1,577.73 | 107 | 107 | 28       | bio | 0.87     | xtal   | NaN          | nopred | 1     | xtal |
| 4f4s | 6  | 1,567.80 | 107 | 107 | 29       | bio | 0.84     | xtal   | NaN          | nopred | 1     | xtal |
| 4f4s | 7  | 1,553.88 | 107 | 107 | 26       | bio | 1.00     | xtal   | NaN          | nopred | 1     | xtal |
| 4f4s | 9  | 1,545.24 | 107 | 107 | 28       | bio | 0.82     | xtal   | NaN          | nopred | 1     | xtal |
| 7ahl | 1  | 2,817.31 | 3   | 3   | 11       | bio | 0.96     | nopred | 0.14         | nopred | 0     | bio  |
| 7ahl | 2  | 2,809.31 | 3   | 3   | 11       | bio | 1.07     | nopred | 0.83         | nopred | 0     | bio  |
| 7ahl | 3  | 2,793.55 | 3   | 3   | 13       | bio | 0.89     | nopred | 0.14         | nopred | 0     | bio  |
| 7ahl | 4  | 2,789.40 | 3   | 3   | 12       | bio | 0.85     | nopred | 0.15         | nopred | 0     | bio  |
| 7ahl | 5  | 2,785.36 | 3   | 3   | 12       | bio | 0.88     | nopred | 0.05         | nopred | 0     | bio  |
| 7ahl | 6  | 2,763.94 | 3   | 3   | 12       | bio | 0.90     | nopred | 0.16         | nopred | 0     | bio  |
| 7ahl | 7  | 2,745.04 | 3   | 3   | 12       | bio | 1.04     | nopred | 0.50         | nopred | 0     | bio  |
