# Supplementary material for: An analysis of oligomerization interfaces in transmembrane proteins
Source: PubMed Central journal article supplement (PMC4015793; doi:10.1186/1472-6807-13-21), 2013-10-17
Supplement: 1472-6807-13-21-S3.pdf [file 1472-6807-13-21-S3.pdf]

### Additional file 3

| PDB  | Lipid name | Chain & Residue | RSCC  | Resolution | Valid |
|------|------------|-----------------|-------|------------|-------|
| 3a7k | L3P        | A 331           | 0.254 | 2.00       | Y     |
| 3a7k | L2P        | A 295           | 0.324 | 2.00       | Y     |
| 3a7k | L3P        | A 298           | 0.333 | 2.00       | Y     |
| 3a7k | L3P        | A 296           | 0.384 | 2.00       | Y     |
| 3a7k | L3P        | B 331           | 0.388 | 2.00       | Y     |
| 3a7k | L3P        | A 297           | 0.425 | 2.00       | Y     |
| 3a7k | L2P        | D 293           | 0.428 | 2.00       | Y     |
| 3a7k | L3P        | D 330           | 0.429 | 2.00       | Y     |
| 3a7k | L3P        | A 301           | 0.435 | 2.00       | Y     |
| 3a7k | L2P        | D 294           | 0.447 | 2.00       | Y     |
| 3a7k | 22B        | D 300           | 0.456 | 2.00       | Y     |
| 3a7k | L1P        | B 293           | 0.463 | 2.00       | Y     |
| 3a7k | L3P        | A 299           | 0.511 | 2.00       | Y     |
| 3a7k | L2P        | B 295           | 0.512 | 2.00       | Y     |
| 3a7k | L1P        | B 294           | 0.515 | 2.00       | Y     |
| 3a7k | L1P        | A 293           | 0.547 | 2.00       | Y     |
| 3a7k | L3P        | A 333           | 0.548 | 2.00       | Y     |
| 3a7k | 22B        | A 300           | 0.595 | 2.00       | Y     |
| 3a7k | L2P        | B 296           | 0.644 | 2.00       | N     |
| 3a7k | L2P        | A 294           | 0.727 | 2.00       | N     |
| 3a7k | 22B        | B 300           | 0.819 | 2.00       | N     |
| 1xio | PEE        | A 310           | 0.690 | 2.00       | N     |
| 1xio | PEE        | A 311           | 0.710 | 2.00       | N     |
| 1xio | PEE        | A 307           | 0.711 | 2.00       | N     |
| 1xio | PEE        | A 312           | 0.717 | 2.00       | N     |
| 1xio | PEE        | A 313           | 0.735 | 2.00       | N     |
| 1xio | PEE        | A 309           | 0.741 | 2.00       | N     |
| 1xio | PEE        | A 315           | 0.756 | 2.00       | N     |
| 1xio | PEE        | A 306           | 0.788 | 2.00       | N     |
| 1xio | PEE        | A 304           | 0.796 | 2.00       | N     |
| 1xio | PEE        | A 303           | 0.799 | 2.00       | N     |
| 1xio | PEE        | A 302           | 0.839 | 2.00       | N     |
| 1xio | PEE        | A 305           | 0.850 | 2.00       | N     |
| 1xio | PEE        | A 308           | 0.857 | 2.00       | N     |
| 2ei4 | L2P        | A 280           | 0.606 | 2.10       | N     |
| 2ei4 | 22B        | A 270           | 0.618 | 2.10       | N     |
| 3ddl | PX4        | B1415           | 0.638 | 1.90       | N     |
| 3ddl | PCW        | B1416           | 0.642 | 1.90       | N     |
| 3ddl | SXN        | A1401           | 0.689 | 1.90       | N     |
| 3ddl | SXN        | B1401           | 0.792 | 1.90       | N     |
| 2z73 | PC1        | B1004           | 0.836 | 2.50       | N     |
| 1k4c | DGA        | C1001           | 0.639 | 2.00       | N     |
| 1okc | PC1        | A 983           | 0.517 | 2.20       | Y     |
| 1okc | CDL        | A 802           | 0.614 | 2.20       | N     |
| 1okc | PC1        | A 980           | 0.792 | 2.20       | N     |
| 1okc | PC1        | A 981           | 0.807 | 2.20       | N     |
| 1okc | CDL        | A 801           | 0.843 | 2.20       | N     |
| 1okc | PC1        | A 982           | 0.859 | 2.20       | N     |
| 1okc | CDL        | A 800           | 0.874 | 2.20       | N     |
| 2c3e | CDL        | A 802           | 0.654 | 2.80       | N     |
| 2c3e | CDL        | A 800           | 0.819 | 2.80       | N     |
| 2c3e | CDL        | A 801           | 0.898 | 2.80       | N     |
| 1ppj | PEE        | D2006           | 0.676 | 2.10       | N     |
| 1ppj | CDL        | P3003           | 0.798 | 2.10       | N     |
| 1ppj | CDL        | D2003           | 0.812 | 2.10       | N     |
| 1ppj | PEE        | Q3006           | 0.857 | 2.10       | N     |
| 1ppj | CDL        | G2004           | 0.861 | 2.10       | N     |
| 1ppj | CDL        | T3004           | 0.889 | 2.10       | N     |
| 1ppj | PEE        | P3007           | 0.916 | 2.10       | N     |
| 1ppj | PEE        | C2007           | 0.940 | 2.10       | N     |
| 3arc | DGD        | d 755           | 0.360 | 1.90       | Y     |
| 3arc | DGD        | D 755           | 0.388 | 1.90       | Y     |
| 3arc | LMG        | Z 784           | 0.482 | 1.90       | Y     |
| 3arc | LMG        | z 784           | 0.540 | 1.90       | Y     |
| 3arc | LMG        | C 776           | 0.558 | 1.90       | Y     |
| 3arc | LHG        | e 772           | 0.610 | 1.90       | N     |
| 3arc | SQD        | B 668           | 0.613 | 1.90       | N     |
| 3arc | SQD        | d 768           | 0.623 | 1.90       | N     |

continued on next page

## Additional file 3 - continued from previous page

| pdb  | lipid name | chain & residue | RSCC  | resolution | valid |
|------|------------|-----------------|-------|------------|-------|
| 3arc | LMG        | c 776           | 0.646 | 1.90       | N     |
| 3arc | SQD        | a 667           | 0.682 | 1.90       | N     |
| 3arc | LHG        | E 772           | 0.701 | 1.90       | N     |
| 3arc | SQD        | L 668           | 0.707 | 1.90       | N     |
| 3arc | SQD        | A 667           | 0.736 | 1.90       | N     |
| 3arc | SQD        | D 768           | 0.755 | 1.90       | N     |
| 3arc | LMG        | a 751           | 0.772 | 1.90       | N     |
| 3arc | LMG        | A 751           | 0.786 | 1.90       | N     |
| 3arc | LMG        | d 692           | 0.860 | 1.90       | N     |
| 3arc | LMG        | c 729           | 0.868 | 1.90       | N     |
| 3arc | LMG        | C 729           | 0.870 | 1.90       | N     |
| 3arc | LMG        | D 692           | 0.893 | 1.90       | N     |
| 3arc | LMG        | B 669           | 0.892 | 1.90       | N     |
| 3arc | SQD        | a 659           | 0.907 | 1.90       | N     |
| 3arc | SQD        | A 659           | 0.905 | 1.90       | N     |
| 3arc | DGD        | c 661           | 0.910 | 1.90       | N     |
| 3arc | DGD        | c 660           | 0.910 | 1.90       | N     |
| 3arc | DGD        | C 660           | 0.920 | 1.90       | N     |
| 3arc | LMG        | b 669           | 0.926 | 1.90       | N     |
| 3arc | LHG        | D 714           | 0.924 | 1.90       | N     |
| 3arc | LHG        | d 714           | 0.924 | 1.90       | N     |
| 3arc | DGD        | H 663           | 0.927 | 1.90       | N     |
| 3arc | DGD        | h 663           | 0.931 | 1.90       | N     |
| 3arc | LHG        | l 694           | 0.942 | 1.90       | N     |
| 3arc | DGD        | C 657           | 0.944 | 1.90       | N     |
| 3arc | LHG        | D 664           | 0.943 | 1.90       | N     |
| 3arc | DGD        | C 661           | 0.947 | 1.90       | N     |
| 3arc | DGD        | c 657           | 0.946 | 1.90       | N     |
| 3arc | LHG        | d 664           | 0.952 | 1.90       | G     |
| 3arc | LHG        | L 694           | 0.955 | 1.90       | G     |
| 3arc | LHG        | d 702           | 0.960 | 1.90       | G     |
| 3arc | LHG        | D 702           | 0.972 | 1.90       | G     |
| 1rwt | DGD        | G9632           | 0.883 | 2.72       | N     |
| 1rwt | DGD        | A 632           | 0.882 | 2.72       | N     |
| 1rwt | DGD        | B2632           | 0.889 | 2.72       | N     |
| 1rwt | DGD        | D5632           | 0.889 | 2.72       | N     |
| 1rwt | DGD        | H6632           | 0.890 | 2.72       | N     |
| 1rwt | DGD        | H7632           | 0.890 | 2.72       | N     |
| 1rwt | DGD        | E4632           | 0.897 | 2.72       | N     |
| 1rwt | DGD        | I8632           | 0.897 | 2.72       | N     |
| 1rwt | DGD        | B1632           | 0.902 | 2.72       | N     |
| 1rwt | DGD        | D3632           | 0.902 | 2.72       | N     |
| 1rwt | LHG        | A 630           | 0.923 | 2.72       | N     |
| 1rwt | LHG        | G6630           | 0.925 | 2.72       | N     |
| 1rwt | LHG        | B1630           | 0.928 | 2.72       | N     |
| 1rwt | LHG        | D3630           | 0.930 | 2.72       | N     |
| 1rwt | LHG        | E4630           | 0.930 | 2.72       | N     |
| 1rwt | LHG        | J9630           | 0.931 | 2.72       | N     |
| 1rwt | LHG        | H7630           | 0.935 | 2.72       | N     |
| 1rwt | LHG        | C2630           | 0.933 | 2.72       | N     |
| 1rwt | LHG        | F5630           | 0.935 | 2.72       | N     |
| 1rwt | LHG        | I8630           | 0.934 | 2.72       | N     |
